# Supplementary material for: The future of coffee and cocoa agroforestry in a warmer Mesoamerica
Source: PubMed Central journal article supplement (PMC6586680; doi:10.1038/s41598-019-45491-7), 2019-06-20
Supplement: 41598_2019_45491_MOESM1_ESM.pdf [file 41598_2019_45491_MOESM1_ESM.pdf]

# Supplementary Information for

## The future of coffee and cocoa agroforestry in a warmer Mesoamerica

Kauê de Sousa\*, Maarten van Zonneveld, Milena Holmgren, Roeland Kindt, Jenny C. Ordoñez

\*Corresponding author

[kaue.desousa@inn.no](mailto:kaue.desousa@inn.no); [k.desousa@cgiar.org](mailto:k.desousa@cgiar.org)

### This PDF file includes:

Supplementary text

Figs. S1 to S7

Tables S1 to S4

## Supporting Information Text

### SI Results

**Changes in suitability.** Coffee plantations in drier ecological zones with annual precipitation lower than 1,400 mm (under the baseline climate) are the most sensitive including the highlands in Mexico across the Pine-Oak Forests, Balsas Dry Forests and Chiapas Depression; midlands in Honduras, in Olancho and Francisco Morazán; Guatemala in Jutiapa, Baja Verapaz and Huehuetenango. Losses are also expected in moist regions along the Atlantic Coast, mainly in the lowlands across the Moist Broadleaf Forests of Matagalpa and Jinotega in Nicaragua. New suitable regions for coffee are identified in the highland Mexico in the Sierra Madre Oriental Pine-Oak Forests and Volcanic Belt Pine-Oak Forests of Oaxaca, Chiapas, Puebla, and Michoacán; in highland Guatemala in the Pine-Oak Forests of Huehuetenango, Quiché and San Marcos; and in highland Costa Rica in the Talamancan Montane Forests of San Jose, Cartago, and Alajuela (Fig. 1a, Fig. S1a).

Suitable areas for cocoa production will likely decrease in 13-17% by the 2050s. New areas with suitable climates for cocoa production will account for 2% of future areas. The most vulnerable areas for cocoa are mainly in lowland Mexico in the Yucatán Moist Forests and the Petén-Veracruz Moist Forests of Quintana Roo, Campeche and Oaxaca; lowland Guatemala in the Petén-Veracruz Moist Forests of Petén; and lowland Panama in the Isthmian-Atlantic Moist Forests in Panama; and in the Dry Forests of lowland El Salvador. The suitability of cocoa under climate change is maintained in 83-87% of its current areas in elevations across the Tropical Moist Broadleaf Forests in Mesoamerica (Fig. 1b, Fig. S1b).

Potential areas for shifting coffee with cocoa comprise Mexico across the moist forests in Sierra De Los Tuxtlas, the Sierra Madre de Chiapas and Petén-Veracruz. Also, the Moist Forests of Nicaragua in Atlantico Sur, Jinotega and Chontales. The Moist Forests and Pine-Oak Forests in Honduras (Olancho, Yoro, Cortes and Santa Barbara). Finally, the Moist Forests and Pine-Oak Forests in Guatemala in Petén-Veracruz, Alta Verapaz, Izabal, Peten, Quiché and Huehuetenango; and the Seasonal Moist Forests in Costa Rica in Puntarenas (Fig. 2, Fig. S2).

**Agroforestry trees availability.** For coffee, areas with high potential to select tree species from a portfolio of at least 10 species per main use include the highlands across the ecological zones in Mexico in the Pine-Oak Forests and Petén-Veracruz Moist Forests of Chiapas, Guerrero, Oaxaca, Veracruz and Puebla. In Guatemala, areas with high potential include Quiché, Alta Verapaz, Jalapa, Chimaltenango and Huehuetenango. In Honduras, the Pine-Oak Forests and Mountain Forests of Francisco Morazán, Intibuca, Comayagua, La Paz and Olancho. For Nicaragua, we identify high potential in Jinotega, Estelí, Matagalpa and Madriz. In Costa Rica in the Talamancan Montane Forests of San Jose, Heredia, Alajuela, Cartago, and Puntarenas.

Vulnerable areas for coffee by the 2050s (where coffee is expected to lose suitability) with high potential for agroforestry (at least 10 species per main use) cover the midlands in Mexico in the Petén-Veracruz Moist Forests, the Central American Mountain Forests and Pine-Oak Forests of Chiapas, Oaxaca, and Veracruz. In Guatemala, across Alta Verapaz, Izabal, and Suchitepequez. For Nicaragua, across Atlantico Sur. In Costa Rica, across Puntarenas and San Jose. And, the province of Chiriqui in Panama.

Areas with high vulnerability (< 3 species per main use) are identified across the midlands Pine-Oak Forests and Dry Forests of Honduras (Comayagua, Paraíso, Yoro and Lempira), Nicaragua (Nueva Segovia, Jinotega and Madriz), El Salvador (La Libertad and Santa Ana) and highlands in Mexico (Oaxaca and Morelos).

For cocoa, areas with high potential for selecting trees from a portfolio of more than 30 species (10 per main use) cover all the humid tropical forest at lowlands across the Pacific coast in Costa Rica, Atlantic coast in Nicaragua, Mosquitia in Honduras, Belize, lowlands north of Cobán and south of Sierra Madre in Guatemala and lowlands in the Gulf of Mexico. There is also a high potential for selecting more than 30 species across the transition zones of the Central American Moist Forests and Central American dry forests in Nicaragua (Atlantico Sur), Guatemala (Quetzaltenango), the Dry Forests of El Salvador (Ahuachapan, Sonsonate and Usulután) and the Moist Forests of Costa Rica (Limon). Vulnerable cocoa areas with low agroforestry options (< 3 species), are identified across the Dry Forest of Honduras (Comayagua, Yoro and Nueva Segovia).

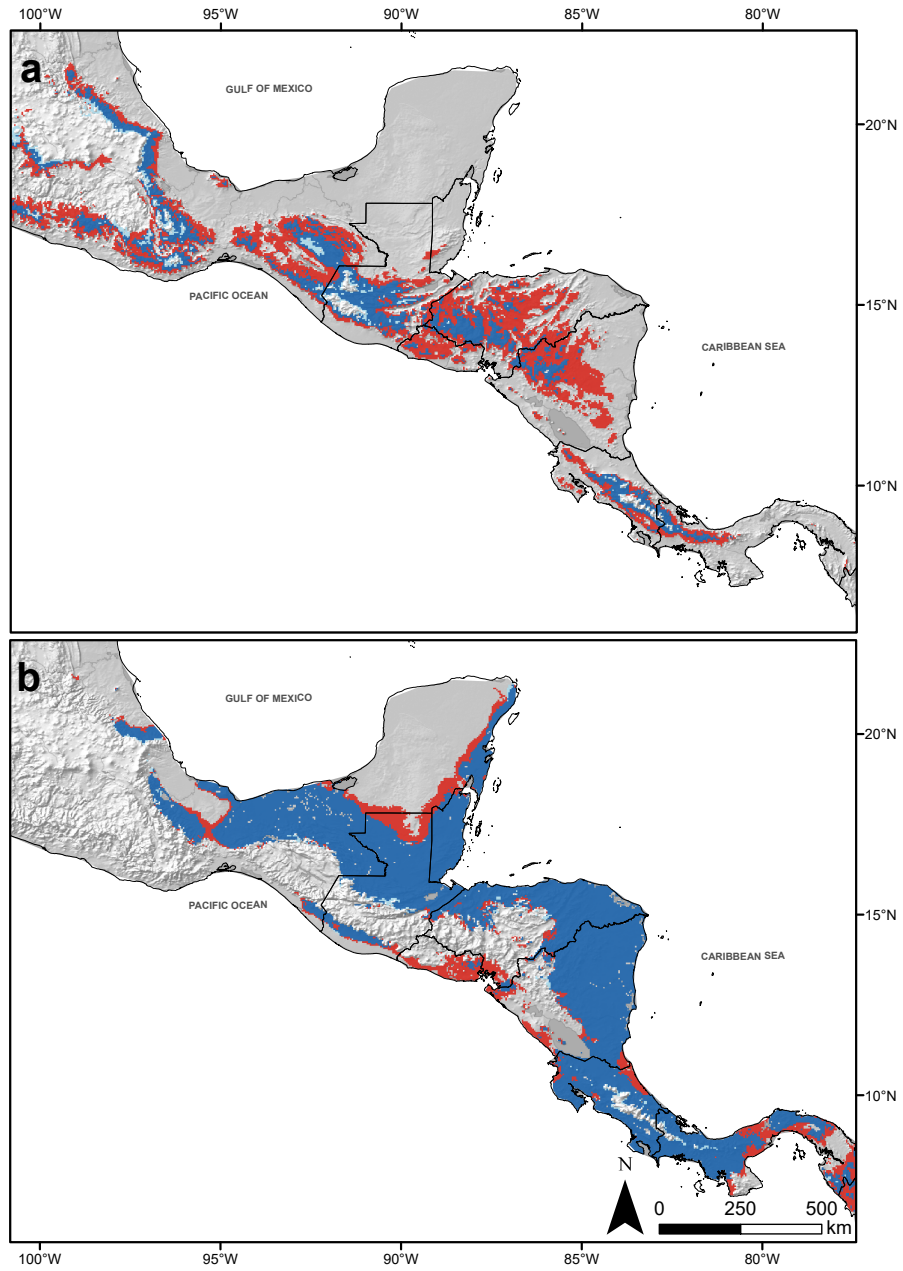

**Fig. S1.** Shifts in suitability due to climate change (RCP 8.5) by 2050 for **a** coffee (*Coffea arabica* L.) and **b** cocoa (*Theobroma cacao* L.) in Mesoamerica. Light blue indicate new areas for coffee/cocoa by 2050. Dark blue indicate areas where coffee/cocoa will remain suitable under climate change. Red indicate areas expected to be no longer suitable (vulnerable) for coffee/cocoa under climate change.

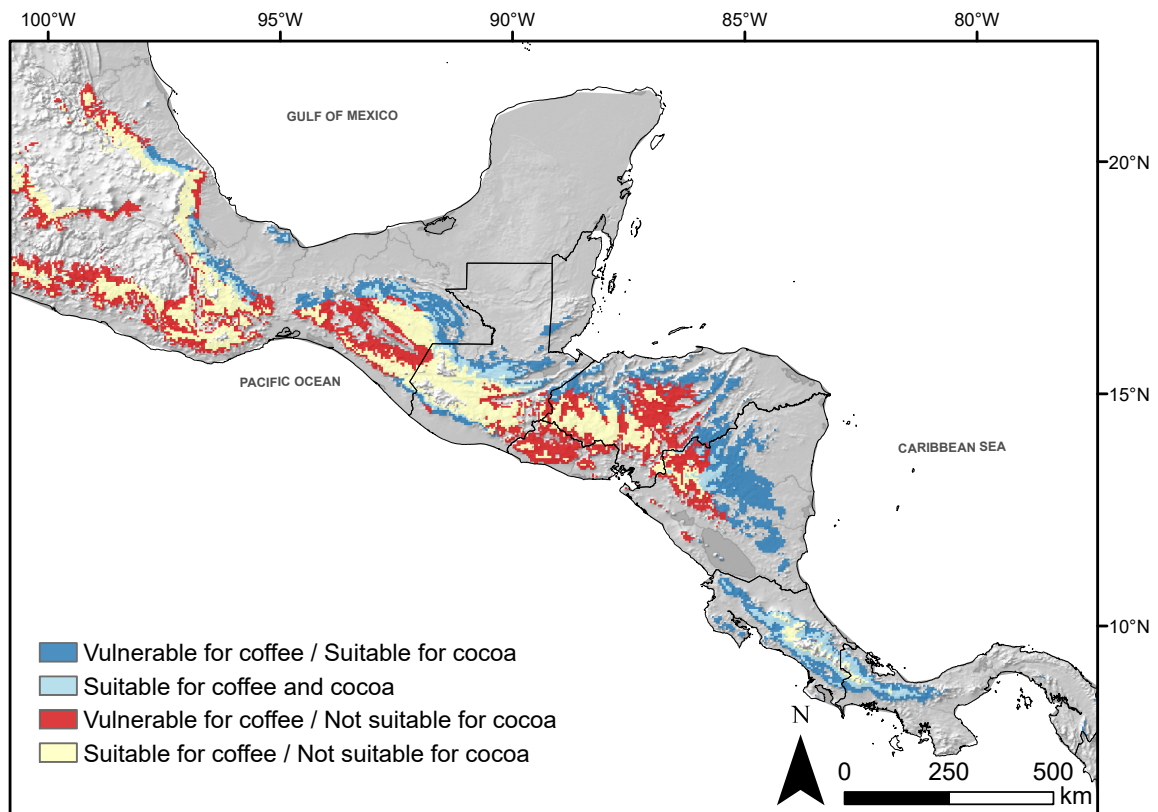

**Fig. S2.** Potential areas for coffee (*Coffea arabica* L.) shifting using cocoa (*Theobroma cacao* L.) in vulnerable areas for coffee under climate change (RCP 8.5) across Mesoamerica. Dark blue indicate vulnerable areas for coffee that can be replaced by cocoa. Light blue indicate areas suitable for coffee and cocoa. Red indicate vulnerable areas for coffee where cocoa is not an alternative under climate change. Light yellow indicate remaining areas for coffee where cocoa is not an alternative.

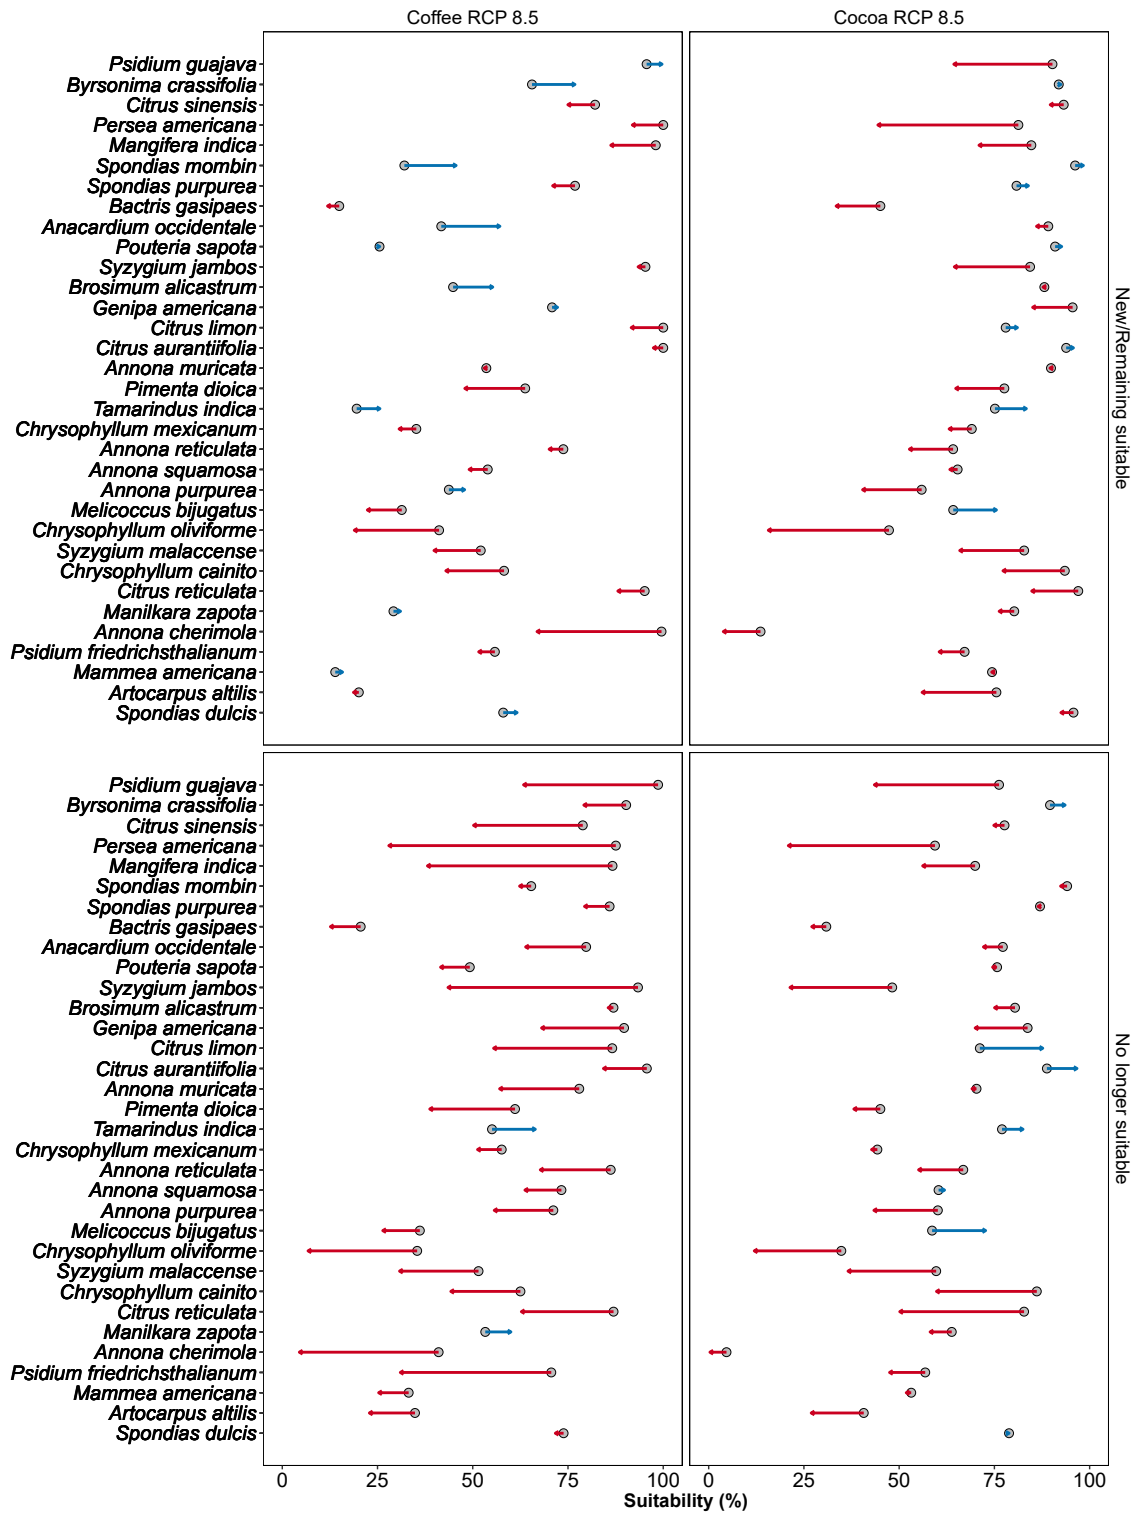

**Fig. S3.** Expected changes in suitability of fruit tree species (expressed as % of current suitable areas), in new/remaining areas and vulnerable (no longer suitable) areas for coffee (*Coffea arabica* L.) and cocoa (*Theobroma cacao* L.) growing areas under climate change (RCP 8.5). Grey dot represent the distribution of a given species under the current climate conditions; Red arrows (left direction), represent decrease in suitable areas by the 2050s; Green arrows (right direction) represent increase in suitable areas by the 2050s.

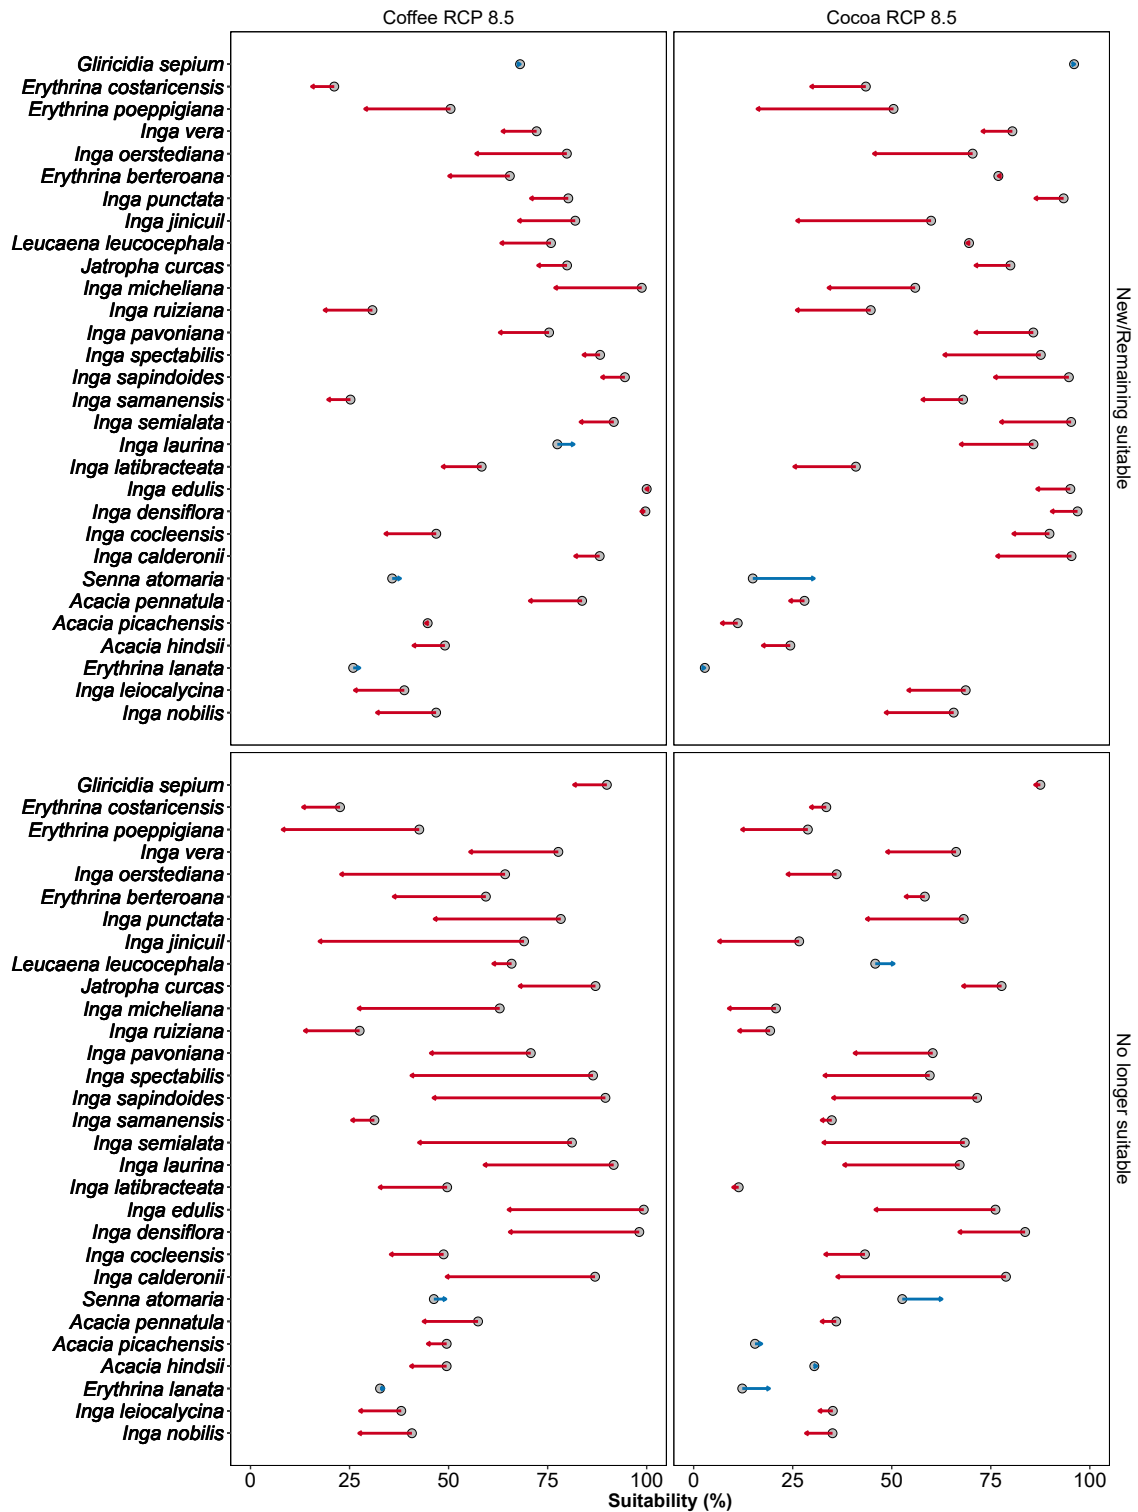

**Fig. S4.** Expected changes in suitability of N-fixing tree species (expressed as % of current suitable areas), in new/remaining areas and vulnerable (no longer suitable) areas for coffee (*Coffea arabica* L.) and cocoa (*Theobroma cacao* L.) growing areas under climate change (RCP 8.5). Grey dot represent the distribution of a given species under the current climate conditions; Red arrows (left direction), represent decrease in suitable areas by the 2050s; Green arrows (right direction) represent increase in suitable areas by the 2050s.

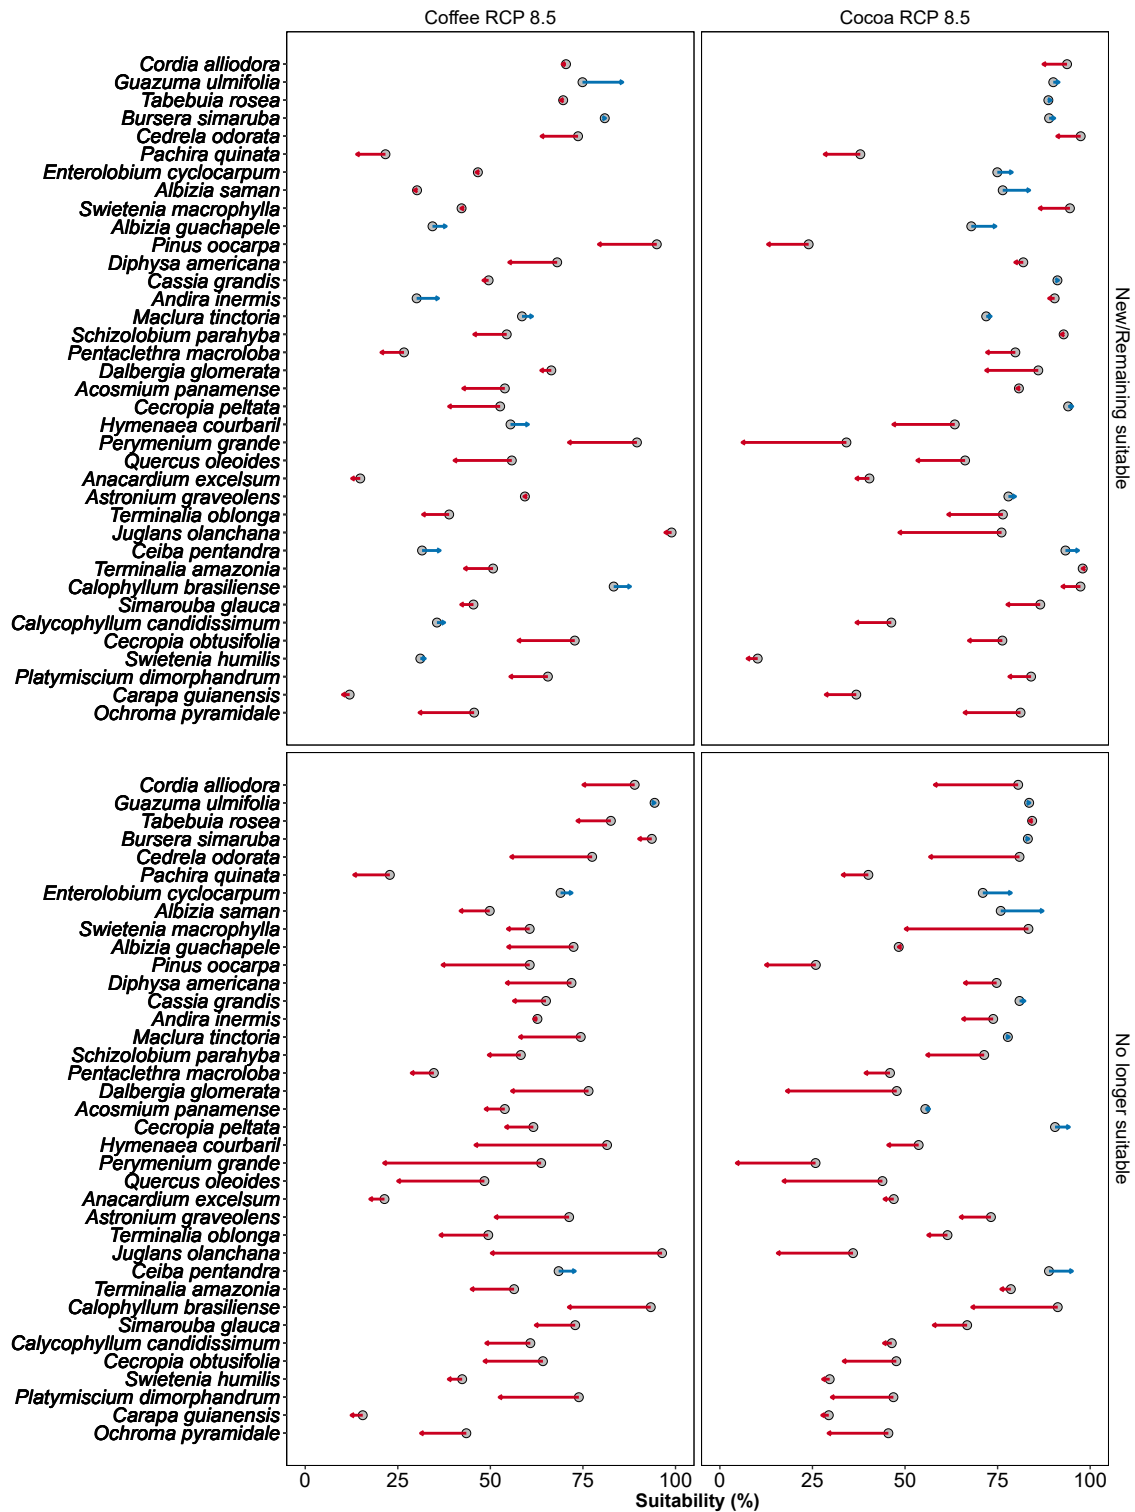

**Fig. S5.** Expected changes in suitability of timber tree species (expressed as % of current suitable areas), in new/remaining areas and vulnerable (no longer suitable) areas for coffee (*Coffea arabica* L.) and cocoa (*Theobroma cacao* L.) growing areas under climate change (RCP 8.5). Grey dot represent the distribution of a given species under the current climate conditions; Red arrows (left direction), represent decrease in suitable areas by the 2050s; Green arrows (right direction) represent increase in suitable areas by the 2050s.

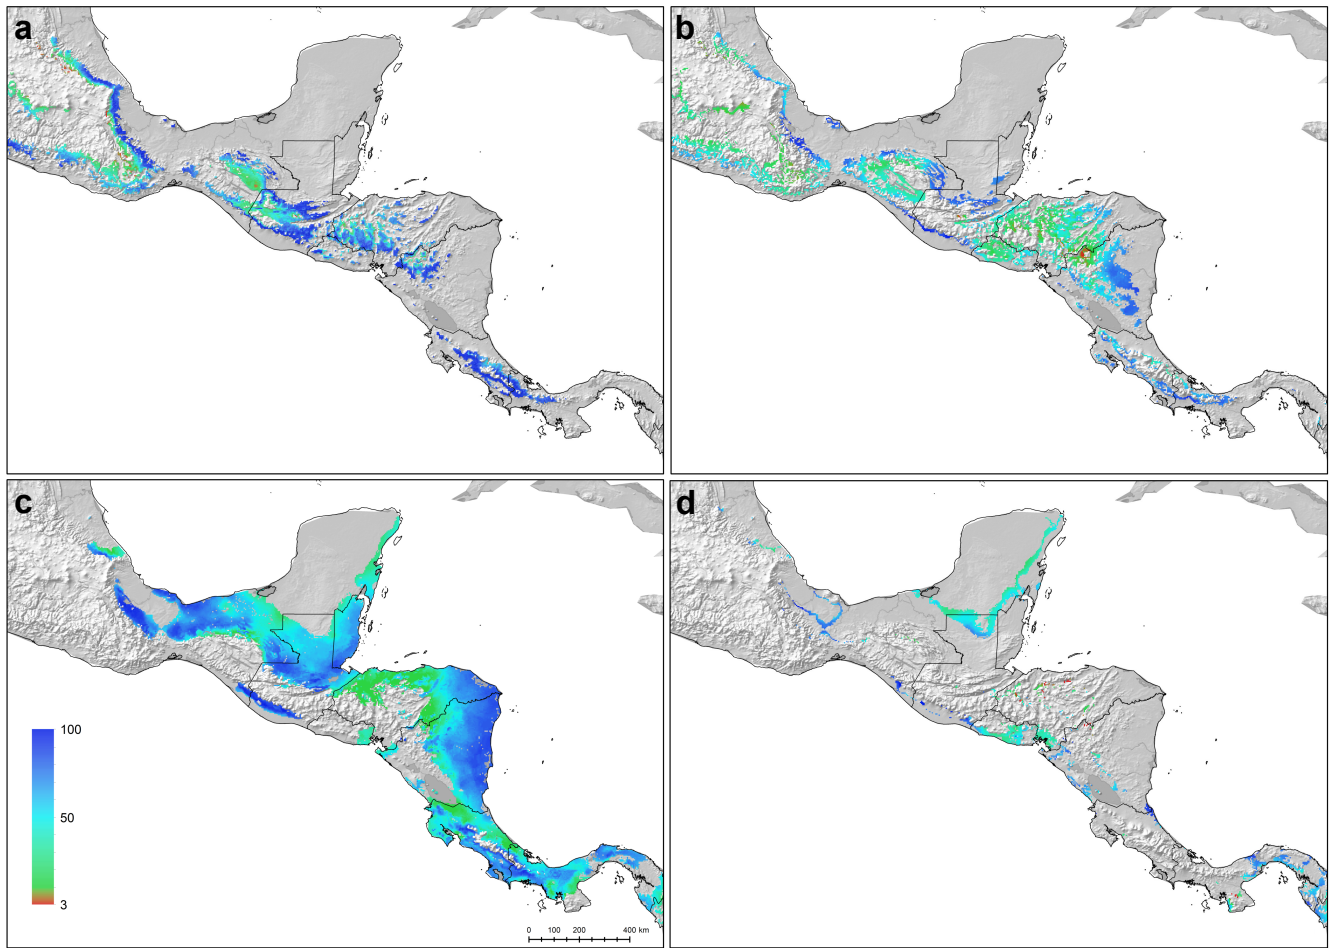

**Fig. S6.** Distribution of the agroforestry species within **a** suitable and **b** vulnerable (no longer suitable) areas for coffee, and **c** suitable and **d** vulnerable areas for cocoa under climate change (RCP 4.5) across Mesoamerica. Colour gradient, from red to dark blue, represent the number of available species per grid-cell at a resolution of 2.5 arc-min ( 5 km).





**Table S1. Summary of news reports about coffee replacement by cocoa in Central America (period 2013-2019).**

| Organization               | Year    | Country / Region       | Main report                                                                                                                                                                                                                                                                                                                                                                                                                                                              | Source |
|----------------------------|---------|------------------------|--------------------------------------------------------------------------------------------------------------------------------------------------------------------------------------------------------------------------------------------------------------------------------------------------------------------------------------------------------------------------------------------------------------------------------------------------------------------------|--------|
| Thomson Reuters Foundation | 2016    | El Salvador, Nicaragua | Farmers started reintroducing cocoa in 2014, coffee losses in low areas meant people could not make a living anymore.                                                                                                                                                                                                                                                                                                                                                    | 1      |
| Bangor daily news          | 2016    | Central America        | Coffee exports decreased in 2014 and cocoa exports increased in 2015, areas are being abandoned due to leaf rust crisis, low coffee prices combined with high cocoa prices                                                                                                                                                                                                                                                                                               | 2      |
| Global Coffee Report       | 2015    | Honduras               | Honduras plan to replace 8 per cent of its coffee plantations with cocoa farms in 2016, they want to reach to 60,000 ha.                                                                                                                                                                                                                                                                                                                                                 | 3      |
| MSN news (video)           | 2016    | Nicaragua              | Farmers from low coffee areas are switching to cocoa, due to crop unsuitability and better prices of cocoa.                                                                                                                                                                                                                                                                                                                                                              | 4      |
| CRS blog                   | 2016    | Nicaragua              | Company sees trends of small farmers from low lands replacing coffee with cocoa, where costs of production and losses are increasing. The transition is not as fast the company would like due to limitations like cultural binding to coffee production and lack of credit given that investments for cocoa would require 4-5 years before the first harvest.                                                                                                           | 5      |
| LRS story hub              | 2018    | El Salvador            | LRS report a trend of coffee replacement with cocoa, they see it as an option to rescue cocoa producing tradition, with local high value varieties. Cocoa alliance (CRS-LRS) project, provides technical assistance, market information, and genetic material to facilitate the transition and develop the cocoa sector in El Salvador.                                                                                                                                  | 6      |
| Medium Corporation         | 2016    | Latin America          | Sustainable Harvest's coffee supply chain conference, speaker met cooperatives from Peru and Nicaragua where farmers are already switching coffee for cocoa. There are advantages of replacement, including areas with more suitable conditions, less labor, transitional models to reduce costs of transition, more cocoa products. Disadvantages include risk of drought, small market for high price cocoa and not possibility to compete with Africa for bulk cocoa. | 7      |
| CBC Canada                 | 2017    | Central America        | Coffee crop suffers from climate change, some options to maintain coffee production are discussed as well as the option of coffee replacement, not actual trends                                                                                                                                                                                                                                                                                                         | 8      |
| LEGISCOMEX                 | No date | Central America        | Financial report about the production increase of fine cocoa in the region. Reports that replacement of coffee is taking place in 3 countries.                                                                                                                                                                                                                                                                                                                           | 9      |
| EL mundo                   | 2015    | El Salvador            | Reports that already in 2012 farmers from low lands started shifting to cocoa, due to attack of pest and diseases and high coffee loses. Initial investment for both crops is similar and there is no technical advice on how to do the replacement.                                                                                                                                                                                                                     | 10     |
| Swiss Cooperation          | 2018    | Nicaragua              | The governments is also assessing the feasibility of the strategy with key actors of the coffee and cocoa sector.                                                                                                                                                                                                                                                                                                                                                        | 11     |
| CATIE Nicaragua            | No date | Nicaragua              | Swiss Cooperation is developing a large program to finance the expansion of cocoa, although replacement of coffee is not an objective of the program in itself, it is mentioned as one of the drivers of cocoa expansion in Nicaragua.                                                                                                                                                                                                                                   | 12     |
|                            |         |                        | CATIE reports about the support of one of its large development programs to replacement of coffee by cocoa in farms under 600 m.a.s.l.                                                                                                                                                                                                                                                                                                                                   |        |

**Sources:**

1. <https://www.reuters.com/article/us-centralamerica-climatechange-coffee-c-idUSKCN10Z0VX>
2. <https://bangordailynews.com/2016/01/18/business/central-american-farmers-turn-to-cocoa-as-climate-change-threatens-coffee/>
3. <http://gcrmag.com/regions/view/honduras-to-replace-coffee-with-cocoa>
4. <https://www.msn.com/es-mx/noticias/opinion/sweet-dreams-as-coffee-farmers-turn-to-cocoa/vi-BBofZbY>
5. <https://coffeelands.crs.org/2016/04/knocking-on-coffees-door-cocoas-case-as-a-coffee-farm-alternative/>
6. <https://lwr.org/story-hub/bean-bar-reviving-cocoa-el-salvador>
7. <https://medium.com/@katie.gilmer.pon/with-coffee-in-crisis-farmers-look-to-cacao-a2d3a8d285c2>
8. <https://www.cbc.ca/news/technology/coffee-climate-change-threatens-1.4285388>
9. <https://www.legiscomex.com/Documentos/centroamerica-busca-mina-oro-cacao-fino-de-aroma-clara-villatoro-actualizacion>
10. <https://elmundo.sv/crisis-del-cafe-impulsa-propuesta-de-sustituir-el-bajio-con-cacao-fino/>
11. [https://www.swissinfo.ch/spa/ayuda-al-desarrollo-de-suiza\\_el-cacao-de-la-esperanza-en-nicaragua/43788304](https://www.swissinfo.ch/spa/ayuda-al-desarrollo-de-suiza_el-cacao-de-la-esperanza-en-nicaragua/43788304)
12. <https://www.catie.ac.cr/nicaragua/es/78-cambio-climatico-proponen-cacao-como-alternativa-al-cafe.html>

**Table S2. Most common tree species in cocoa (*Theobroma cacao* L.) and coffee (*Coffea arabica* L.) systems across Mesoamerica selected for the study. Ordered by family name.**

| Begin of Table S2 |                            |           |          |             |                    |
|-------------------|----------------------------|-----------|----------|-------------|--------------------|
| Family            | Species                    | Frequency | Main use | Neotropical | Presence locations |
| Anacardiaceae     | Mangifera indica           | 0.8110    | Fruit    | No          | 620                |
| Anacardiaceae     | Spondias mombin            | 0.6960    | Fruit    | Yes         | 1256               |
| Anacardiaceae     | Spondias purpurea          | 0.6160    | Fruit    | Yes         | 634                |
| Anacardiaceae     | Anacardium occidentale     | 0.3300    | Fruit    | Yes         | 1247               |
| Anacardiaceae     | Anacardium excelsum        | 0.1890    | Timber   | Yes         | 234                |
| Anacardiaceae     | Astronium graveolens       | 0.1820    | Timber   | Yes         | 557                |
| Anacardiaceae     | Spondias dulcis            | 0.0101    | Fruit    | Yes         | 68                 |
| Annonaceae        | Annona muricata            | 0.1590    | Fruit    | Yes         | 564                |
| Annonaceae        | Annona reticulata          | 0.0640    | Fruit    | Yes         | 688                |
| Annonaceae        | Annona purpurea            | 0.0600    | Fruit    | Yes         | 238                |
| Annonaceae        | Annona squamosa            | 0.0600    | Fruit    | Yes         | 456                |
| Annonaceae        | Annona cherimola           | 0.0260    | Fruit    | Yes         | 870                |
| Arecaceae         | Bactris gasipaes           | 0.4630    | Fruit    | Yes         | 170                |
| Bignoniaceae      | Tabebuia rosea             | 6.4360    | Timber   | Yes         | 673                |
| Boraginaceae      | Cordia alliodora           | 11.639    | Timber   | Yes         | 1474               |
| Burseraceae       | Bursera simaruba           | 4.7680    | Timber   | Yes         | 3316               |
| Calophyllaceae    | Mammea americana           | 0.0140    | Fruit    | Yes         | 112                |
| Clusiaceae        | Calophyllum brasiliense    | 0.1170    | Timber   | Yes         | 1386               |
| Combretaceae      | Terminalia oblonga         | 0.1770    | Timber   | Yes         | 380                |
| Combretaceae      | Terminalia amazonia        | 0.1240    | Timber   | Yes         | 715                |
| Compositae        | Perymenium grande          | 0.1980    | Timber   | Yes         | 258                |
| Euphorbiaceae     | Jatropha curcas            | 0.1530    | N-fixing | Yes         | 683                |
| Fagaceae          | Quercus oleoides           | 0.1960    | Timber   | Yes         | 578                |
| Juglandaceae      | Juglans olanchana          | 0.1610    | Timber   | Yes         | 104                |
| Lauraceae         | Persea americana           | 1.0020    | Fruit    | Yes         | 1434               |
| Leguminosae       | Gliricidia sepium          | 12.326    | N-fixing | Yes         | 864                |
| Leguminosae       | Erythrina costaricensis    | 2.7770    | N-fixing | Yes         | 171                |
| Leguminosae       | Enterolobium cyclocarpum   | 2.0850    | Timber   | Yes         | 556                |
| Leguminosae       | Erythrina poeppigiana      | 1.5680    | N-fixing | Yes         | 309                |
| Leguminosae       | Albizia saman              | 1.4360    | Timber   | Yes         | 359                |
| Leguminosae       | Inga vera                  | 0.9600    | N-fixing | Yes         | 2450               |
| Leguminosae       | Inga oerstediana           | 0.8430    | N-fixing | Yes         | 526                |
| Leguminosae       | Albizia guachapele         | 0.6980    | Timber   | Yes         | 281                |
| Leguminosae       | Erythrina berteroa         | 0.4920    | N-fixing | Yes         | 293                |
| Leguminosae       | Diphysa americana          | 0.4560    | Timber   | Yes         | 277                |
| Leguminosae       | Andira inermis             | 0.3920    | Timber   | Yes         | 808                |
| Leguminosae       | Cassia grandis             | 0.3920    | Timber   | Yes         | 381                |
| Leguminosae       | Inga punctata              | 0.3830    | N-fixing | Yes         | 1242               |
| Leguminosae       | Schizolobium parahyba      | 0.2940    | Timber   | Yes         | 410                |
| Leguminosae       | Pentaclethra macroleoba    | 0.2740    | Timber   | Yes         | 270                |
| Leguminosae       | Dalbergia glomerata        | 0.2640    | Timber   | Yes         | 149                |
| Leguminosae       | Acosmium panamense         | 0.2620    | Timber   | Yes         | 217                |
| Leguminosae       | Inga jinicuil              | 0.2020    | N-fixing | Yes         | 168                |
| Leguminosae       | Hymenaea courbaril         | 0.1990    | Timber   | Yes         | 1228               |
| Leguminosae       | Leucaena leucocephala      | 0.1930    | N-fixing | Yes         | 1518               |
| Leguminosae       | Inga micheliana            | 0.0880    | N-fixing | Yes         | 82                 |
| Leguminosae       | Platymiscium dimorphandrum | 0.0880    | Timber   | Yes         | 84                 |
| Leguminosae       | Inga ruiziana              | 0.0860    | N-fixing | Yes         | 495                |
| Leguminosae       | Tamarindus indica          | 0.0860    | Fruit    | No          | 642                |
| Leguminosae       | Inga pavoniana             | 0.0780    | N-fixing | Yes         | 224                |
| Leguminosae       | Inga cocleensis            | 0.0490    | N-fixing | Yes         | 94                 |

| Continuation of Table S2 |                                    |           |          |             |                    |
|--------------------------|------------------------------------|-----------|----------|-------------|--------------------|
| Family                   | Species                            | Frequency | Main use | Neotropical | Presence locations |
| Leguminosae              | <i>Inga calderonii</i>             | 0.0490    | N-fixing | Yes         | 12865              |
| Leguminosae              | <i>Inga densiflora</i>             | 0.0490    | N-fixing | Yes         | 10544              |
| Leguminosae              | <i>Inga edulis</i>                 | 0.0490    | N-fixing | Yes         | 10953              |
| Leguminosae              | <i>Inga latibracteata</i>          | 0.0490    | N-fixing | Yes         | 96                 |
| Leguminosae              | <i>Inga laurina</i>                | 0.0490    | N-fixing | Yes         | 930                |
| Leguminosae              | <i>Inga semialata</i>              | 0.0490    | N-fixing | Yes         | 11112              |
| Leguminosae              | <i>Inga samanensis</i>             | 0.0490    | N-fixing | Yes         | 95                 |
| Leguminosae              | <i>Inga sapindoides</i>            | 0.0490    | N-fixing | Yes         | 11644              |
| Leguminosae              | <i>Inga spectabilis</i>            | 0.0490    | N-fixing | Yes         | 11321              |
| Leguminosae              | <i>Senna atomaria</i>              | 0.0380    | N-fixing | Yes         | 1530               |
| Leguminosae              | <i>Acacia pennatula</i>            | 0.0220    | N-fixing | Yes         | 1375               |
| Leguminosae              | <i>Acacia picachensis</i>          | 0.0080    | N-fixing | Yes         | 199                |
| Leguminosae              | <i>Acacia hindsii</i>              | 0.0070    | N-fixing | Yes         | 287                |
| Leguminosae              | <i>Erythrina lanata</i>            | 0.0060    | N-fixing | Yes         | 194                |
| Leguminosae              | <i>Inga leiocalycina</i>           | 0.0040    | N-fixing | Yes         | 306                |
| Leguminosae              | <i>Inga nobilis</i>                | 0.0010    | N-fixing | Yes         | 1011               |
| Malpighiaceae            | <i>Byrsonima crassifolia</i>       | 2.0990    | Fruit    | Yes         | 2152               |
| Malvaceae                | <i>Guazuma ulmifolia</i>           | 8.7530    | Timber   | Yes         | 5441               |
| Malvaceae                | <i>Pachira quinata</i>             | 2.5080    | Timber   | Yes         | 175                |
| Malvaceae                | <i>Ceiba pentandra</i>             | 0.1250    | Timber   | Yes         | 773                |
| Malvaceae                | <i>Ochroma pyramidale</i>          | 0.0530    | Timber   | Yes         | 632                |
| Meliaceae                | <i>Cedrela odorata</i>             | 3.9730    | Timber   | Yes         | 1734               |
| Meliaceae                | <i>Swietenia macrophylla</i>       | 0.9210    | Timber   | Yes         | 821                |
| Meliaceae                | <i>Swietenia humilis</i>           | 0.0920    | Timber   | Yes         | 411                |
| Meliaceae                | <i>Carapa guianensis</i>           | 0.0700    | Timber   | Yes         | 905                |
| Moraceae                 | <i>Maclura tinctoria</i>           | 0.2990    | Timber   | Yes         | 1252               |
| Moraceae                 | <i>Brosimum alicastrum</i>         | 0.2490    | Fruit    | Yes         | 1373               |
| Moraceae                 | <i>Artocarpus altilis</i>          | 0.0130    | Fruit    | No          | 149                |
| Myrtaceae                | <i>Psidium guajava</i>             | 2.2520    | Fruit    | Yes         | 1465               |
| Myrtaceae                | <i>Syzygium jambos</i>             | 0.2490    | Fruit    | No          | 864                |
| Myrtaceae                | <i>Pimenta dioica</i>              | 0.1360    | Fruit    | Yes         | 492                |
| Myrtaceae                | <i>Syzygium malaccense</i>         | 0.0430    | Fruit    | No          | 163                |
| Myrtaceae                | <i>Psidium friedrichsthalianum</i> | 0.0220    | Fruit    | Yes         | 68                 |
| Pinaceae                 | <i>Pinus oocarpa</i>               | 0.4600    | Timber   | Yes         | 789                |
| Rubiaceae                | <i>Genipa americana</i>            | 0.2390    | Fruit    | Yes         | 1318               |
| Rubiaceae                | <i>Calycophyllum candidissimum</i> | 0.1090    | Timber   | Yes         | 477                |
| Rutaceae                 | <i>Citrus sinensis</i>             | 1.6890    | Fruit    | No          | 257                |
| Rutaceae                 | <i>Citrus limon</i>                | 0.2310    | Fruit    | No          | 299                |
| Rutaceae                 | <i>Citrus aurantiifolia</i>        | 0.2050    | Fruit    | No          | 1330               |
| Rutaceae                 | <i>Citrus reticulata</i>           | 0.0330    | Fruit    | No          | 152                |
| Sapindaceae              | <i>Melicoccus bijugatus</i>        | 0.0540    | Fruit    | Yes         | 145                |
| Sapotaceae               | <i>Pouteria sapota</i>             | 0.2870    | Fruit    | Yes         | 256                |
| Sapotaceae               | <i>Chrysophyllum mexicanum</i>     | 0.0750    | Fruit    | Yes         | 796                |
| Sapotaceae               | <i>Chrysophyllum oliviforme</i>    | 0.0490    | Fruit    | Yes         | 100                |
| Sapotaceae               | <i>Chrysophyllum cainito</i>       | 0.0360    | Fruit    | Yes         | 516                |
| Sapotaceae               | <i>Manilkara zapota</i>            | 0.0260    | Fruit    | Yes         | 633                |
| Simaroubaceae            | <i>Simarouba glauca</i>            | 0.1130    | Timber   | Yes         | 341                |
| Urticaceae               | <i>Cecropia peltata</i>            | 0.2070    | Timber   | Yes         | 830                |
| Urticaceae               | <i>Cecropia obtusifolia</i>        | 0.1070    | Timber   | Yes         | 572                |

End of Table S2

**Table S3. General circulation model (GCM) used to obtain climatic variables under scenarios RCP 4.5 and RCP 8.5 in 2050.**

| GCM            | Abbreviation |
|----------------|--------------|
| ACCESS1-0      | AC           |
| BCC-CSM1-1     | BC           |
| CCSM4          | CC           |
| CNRM-CM5       | CN           |
| GFDL-CM3       | GF           |
| GISS-E2-R      | GS           |
| HadGEM2-AO     | HD           |
| HadGEM2-CC     | HG           |
| HadGEM2-ES     | HE           |
| INMCM4         | IN           |
| IPSL-CM5A-LR   | IP           |
| MIROC-ESM-CHEM | MI           |
| MIROC-ESM      | MR           |
| MIROC5         | MC           |
| MPI-ESM-LR     | MP           |
| MRI-CGCM3      | MG           |
| NorESM1-M      | NO           |

**Table S4. Algorithms for environmental niche modelling included in the analysis of suitability of coffee, cocoa and tree species.**

| Algorithm                                                        | Method  | Description                                                                                                                                                                                                                                                                                                                             |
|------------------------------------------------------------------|---------|-----------------------------------------------------------------------------------------------------------------------------------------------------------------------------------------------------------------------------------------------------------------------------------------------------------------------------------------|
| Envelope model                                                   | BIOCLIM | It computes the similarity of a location by comparing the $f_i(x_i)$ at any location to a percentile distribution of the values at known locations of occurrence.                                                                                                                                                                       |
| Multivariate distance                                            | DOMAIN  | It computes the Gower distance between environmental variables at any location and those at any of the known locations of occurrence.                                                                                                                                                                                                   |
| Regression: Multivariate adaptive regression splines             | MARS    | It is a non-parametric regression technique that automatically models non-linearity and interactions between variables.                                                                                                                                                                                                                 |
| Flexible discriminant analysis                                   | FDA     | It is a supervise classification method. The method combines different models for multi-group non-linear classification.                                                                                                                                                                                                                |
| Additive models: Generalized additive models                     | GAM     | Semi-parametric approach to predicting non-linear responses to a suite of predictor.                                                                                                                                                                                                                                                    |
| Stepwise GAM                                                     | GAMSTEP | Builds a GAM model in a step-wise fashion.                                                                                                                                                                                                                                                                                              |
| Mixed GAM Computation Vehicle                                    | MGCV    | It provides functions for generalized additive and generalized additive mixed modelling.                                                                                                                                                                                                                                                |
| Boosted regression models: Generalized boosted regression models | GBM     | Based on prediction components, where each component consists of a different weighted sum of nonlinear transformations of the predictor variables.                                                                                                                                                                                      |
| Stepwise boosted regression tree models                          | GBMSTEP | It is a technique that aims to improve the performance of a single model by fitting many models based on stepwise selection and combining them for prediction.                                                                                                                                                                          |
| Generalized linear models                                        | GLM     | Generalizes linear regression by allowing the linear model to be related to the response variable via a link function.                                                                                                                                                                                                                  |
| Stepwise generalized linear models                               | GLMSTEP | It includes regression models in which the predictive variables are selected by an automated algorithm that involves backward elimination or forward selection.                                                                                                                                                                         |
| Maximum entropy                                                  | MAXENT  | It is a machine-learning method that estimates the species distribution probability by assessing the maximum entropy distribution, so that the most spread-out, or closest to uniform.                                                                                                                                                  |
| Artificial neural networks                                       | NNET    | It is a machine learning approach that employs an adaptive structure, which can be trained with application data to capture complex relationships between input and out variables.                                                                                                                                                      |
| Random forests                                                   | RF      | It is a collection of tree-structured weak learners that comprised identically distributed random vectors where each tree contributes to a prediction.                                                                                                                                                                                  |
| Recursive partitioning and regression trees                      | RPART   | It is a simple nonparametric regression approach, where the space spanned by all predictor variables, is recursively partitioned into a set of rectangular areas. The partition is created such that observations with similar response values are grouped and a constant value of the response variable is predicted within each area. |
| Support vector machines                                          | SVM     | Machine-learning methods that are based on classification (C-svc, nu-svc), novelty detection (one-class-svc), and regression (eps-svr, nu-svr).                                                                                                                                                                                         |
| Support vector machines                                          | SVME    | It is used to train an SVM and carry out general regression and classification (of nu and epsilon-type), as well as density-estimation.                                                                                                                                                                                                 |
